# Supplementary material for: A fluorescent metal sensor based on macrocyclic chelation
Source: Royal Society of Chemistry journal article supplement (doi:10.1039/b100535i), 2001-01-01
Supplement: b100535i1.doc [file b100535i1.doc]

**Table 1.** Electrospray MS analysis of metal complexes of ligands **3a-c**.a

|  | ion : % area a | Cu2+ | 5 eq. Cu2+ | Hg2+ | 5 eq.b Hg2+ | Ni2+ | 5 eq. Ni2+ | Zn2+ | 5 eq. Zn2+ | Co2+ | 5 eq. Co2+ |
| --- | --- | --- | --- | --- | --- | --- | --- | --- | --- | --- | --- |
| **3a** | [ML-H]+ | 54c |  | 34e |  | 29 | 16 |  |  | 3 | 4 |
| [(ML-H)2]2+ | 46 |  | 7 |  | 9 | 2 |  |  |  |  |
| [MLOAc]+ |  |  |  |  | 12 | 20 | 95 | 4.3 | 76 | 50 |
| [(MLOAc)2]2+ |  |  |  |  | 50 | 10 |  | 7.5 |  |  |
| [M2L(OAc)3]+ |  | 100 |  |  |  | 27g | 5 | 89 | 21 | 46 |
| [M3L(OAc)5]+ |  |  |  |  |  |  |  | 0.3 |  | 1 |
| **3b** | [ML-H]+ | 66c | 25c | 32f |  |  | 10 |  |  |  |  |
| [(ML-H)2]2+ | 7 |  | 54 |  |  | 2 |  |  |  |  |
| [MLOAc]+ | 11d | 9 |  |  | 13 | 15 | 100 | 30 | 84 | 49 |
| [(MLOAc)2]2+ | 2 |  |  |  | 87 | 10h |  |  |  |  |
| [M2L(OAc)3]+ |  | 63 |  |  |  | 22i |  | 55 | 16 | 51 |
| [M3L(OAc)5]+ |  | 3 |  |  |  |  |  | 15 |  |  |
| **3c** | [ML-H]+ | 90c | 28c | 50 |  |  |  |  |  |  | 2 |
| [(ML-H)2]2+ |  |  | 50 |  |  | tracek |  |  |  |  |
| [MLOAc]+ | 10 | 9 |  |  | 6 |  | 100 | 7 | 88 | 54 |
| [(MLOAc)2]2+ |  |  |  |  | 94 |  |  |  |  |  |
| [M2L(OAc)3]+ |  | 63 |  |  |  |  |  | 81 | 12 | 43 |
| [M3L(OAc)5]+ |  |  |  |  |  |  |  | 12 |  | 1 |

a Observed ions in electrospray MS analysis of 10-3 M solutions of ligands L = **3a-c** as free base and M(OAc)2 in methanol. Intensity is given in percent area of total attributed peaks, which represent > 90 % of total intensity recorded at m/z > 400. Only uncomplexed ligands are detected under the same conditions with **3a-c** and Ba(OAc)2, Ca(OAc)2 or Mg(OAc)2. b Only free ligands are observed with excess Hg2+, probably due to the acidity of Hg(OAc)2 which leads to decomplexation. c The pattern observed for these peaks indicates [CuL]+ (30-50 %), [CuL-H]+ (40-60 %) and [CuL-2H]+ (10 %). d Also observed: [(Cu.**3b**-H)2HOAc]2+ (14 %). e Also observed: [Hg.**3a.**OH.OH2]+ (59 %). f Also observed: [(Hg.**3b.**OH)2]2+ (14 %). g Also observed: [Ni3(**3a**)2(OAc)4]2+ (19 %). h Also observed: [(Ni.**3b**-H)2HOAc]2+ (5 %). i Also observed: [Ni3(**3b**)2(OAc)4]2+ (21 %) and [Ni4(**3a**)2(OAc)6]2+ (14 %). k no other Ni-containing species or free ligand detected. See also legend of Fig. 3.
