# Supplementary material for: A fluorescent metal sensor based on macrocyclic chelation
Source: Royal Society of Chemistry journal article supplement (doi:10.1039/b100535i), 2001-01-01
Supplement: b100535i2.doc [file b100535i2.doc]

**
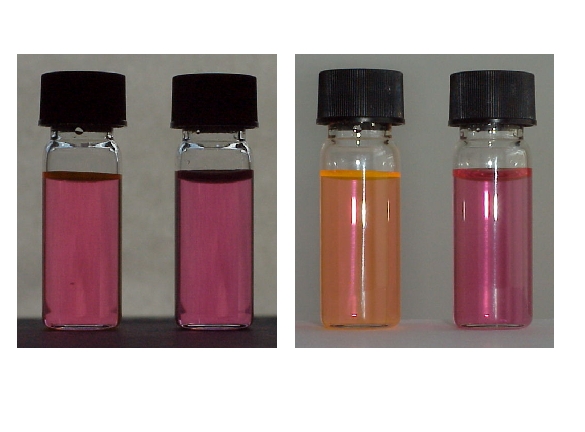
**

**Supplementary Figure**. Solution of fluorescent ligand **3c** (left vial) and its non-fluorescent complex with Cu2+ (right vial) under transparent light (picture at left) or under reflected light (flash, picture at right, only free ligand **3c** appears orange). The same effect is observed with **3a** and **3b**. Solutions are 100 M in 40% aq. DMF, 5 mM Tris pH 9.0.
